# Supplementary material
Source: PubMed Central journal article supplement (PMC2756561)
Supplement: NIHMS128104-supplement-s.pdf [file NIHMS128104-supplement-s.pdf]

**Supplementary Table and Figure****Supplementary Table S1. List of non-pathogenic variants identified in this study**

| <b>Polymorphism</b> | <b>No. of Subjects</b> | <b>Location in gene</b> |
|---------------------|------------------------|-------------------------|
| g.4141C>T (p.D33)   | 1                      | Ex 1                    |
| g.4450G>A           | 3                      | IVS 2                   |
| g.5059_5060insGTCA  | 1                      | IVS 3                   |
| g.6048G>A           | 3                      | IVS 7                   |
| g.77754C>T          | 7                      | 3'UTR                   |

All mutation numbering is based on the genomic DNA sequence. Ensembl gene ID: ENSG00000030582 (NCBI36:17:39778017:39785996:1).

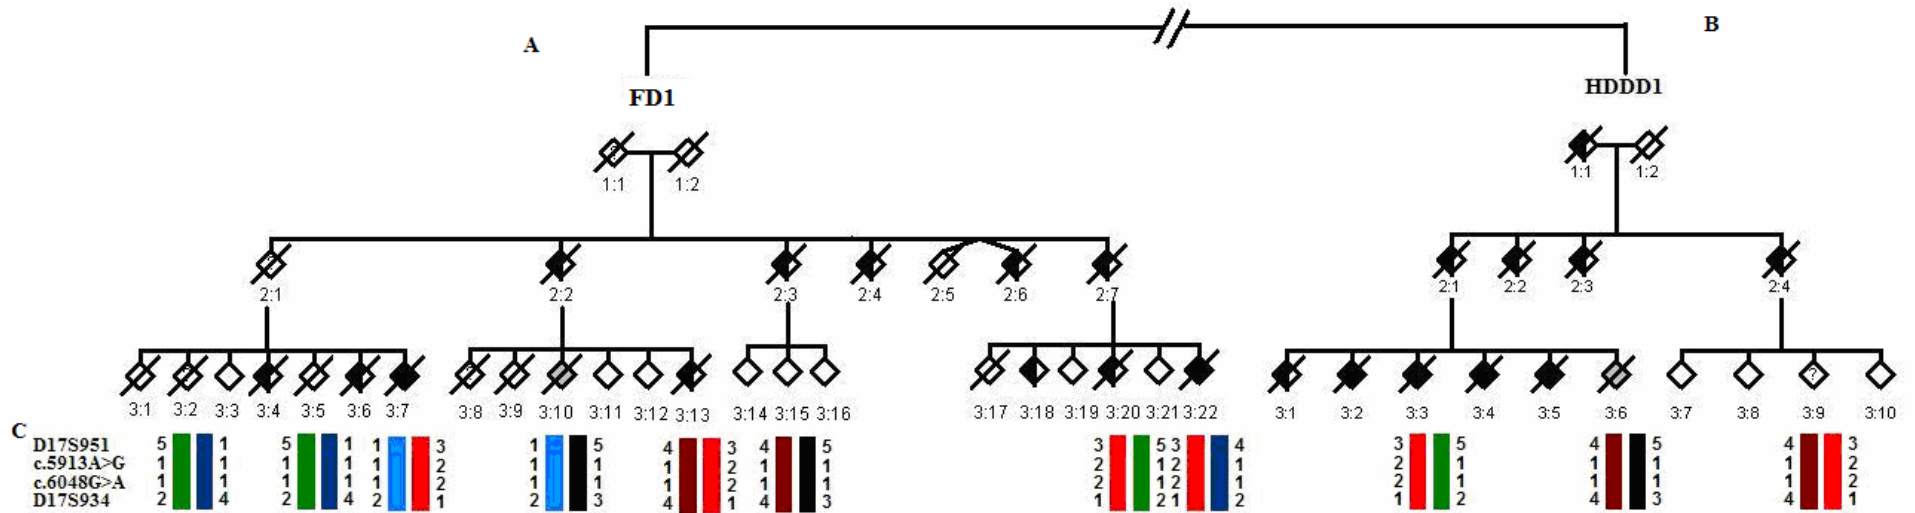

**Supplementary Figure S1. Mutational analysis.** Segregation analysis of IVS6-2G>A transition within (A) FD1 kindred, (B) HDDD1 kindred. Affected and 50% of the at risk individuals are heterozygous for the mutation, (C) Haplotype analysis using two microsatellite markers flanking *GRN*, the pathogenic g.5913A>G (IVS6-2A>G) and a non-pathogenic variation in intron 7 (IVS7+8A>G) shows an unambiguous disease haplotype shared between the two kindreds.
